# Supplementary material for: Shade Avoidance Components and Pathways in Adult Plants Revealed by Phenotypic Profiling
Source: PubMed Central journal article supplement (PMC4398415; doi:10.1371/journal.pgen.1004953), 2015-04-15

Figure S2A hypocotyl

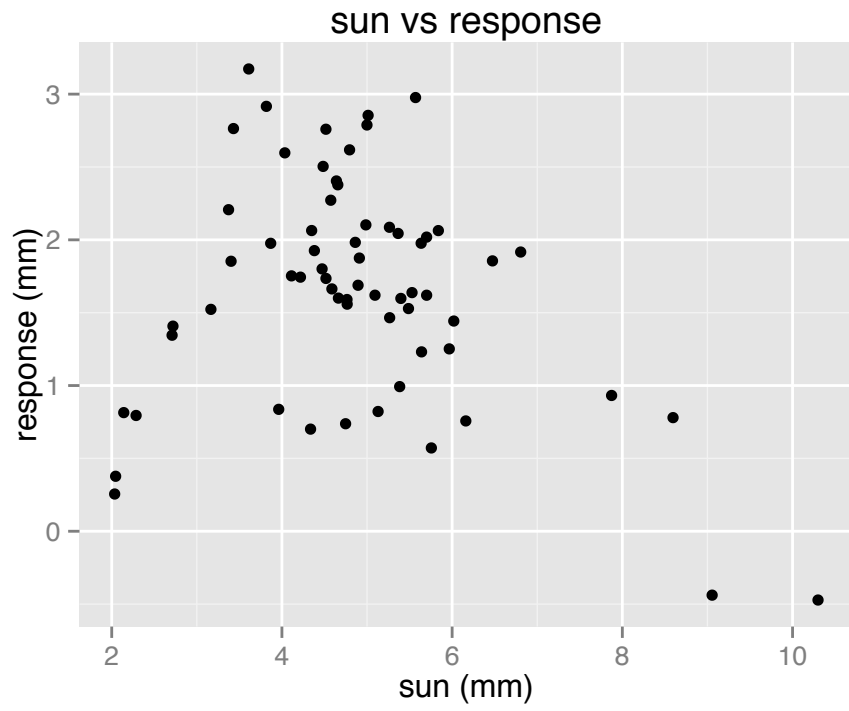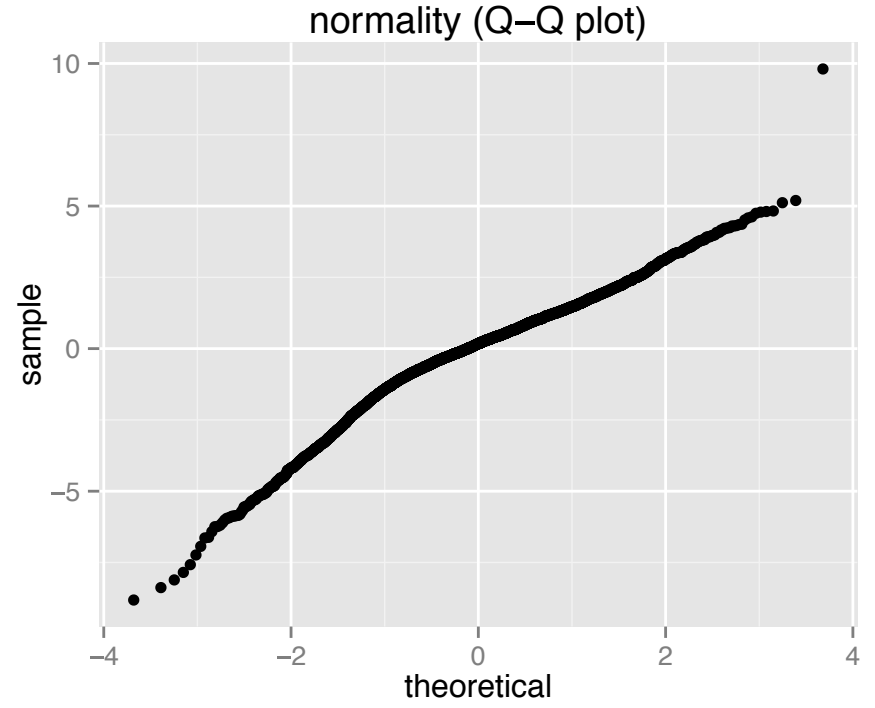

Figure S2B. PL

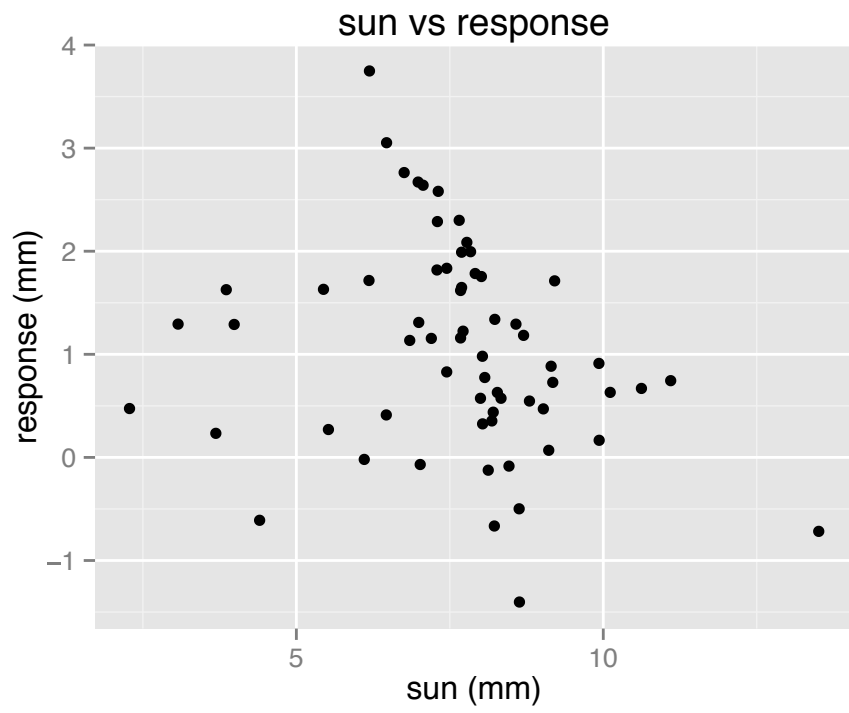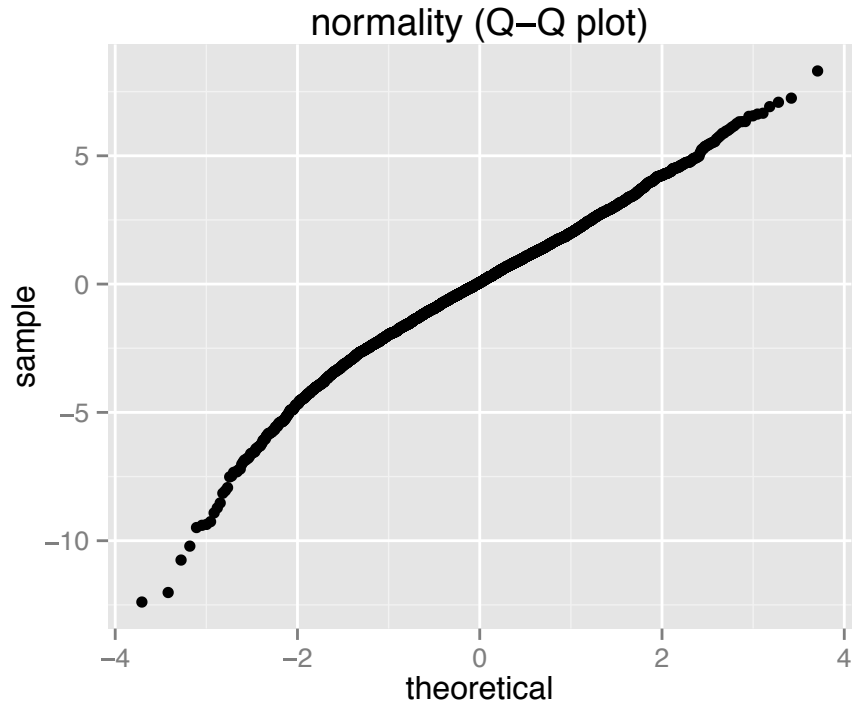

Figure S2C. BL

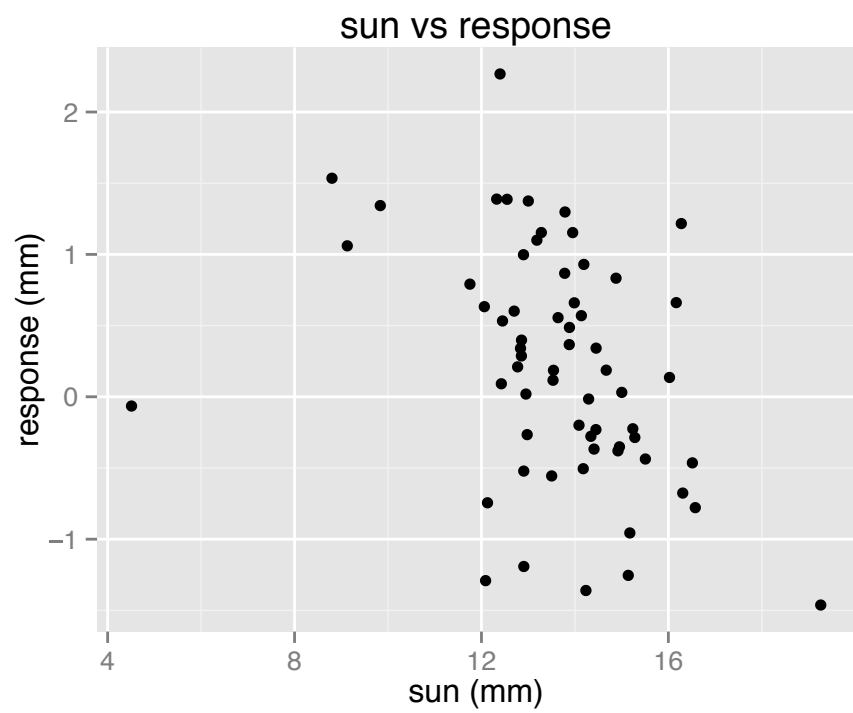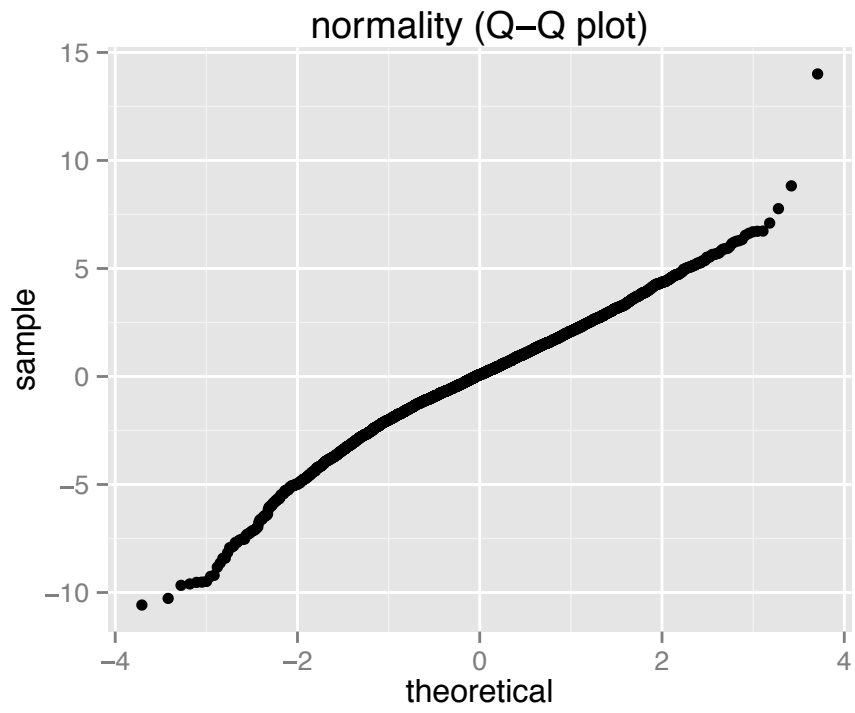

Figure S2D. BW

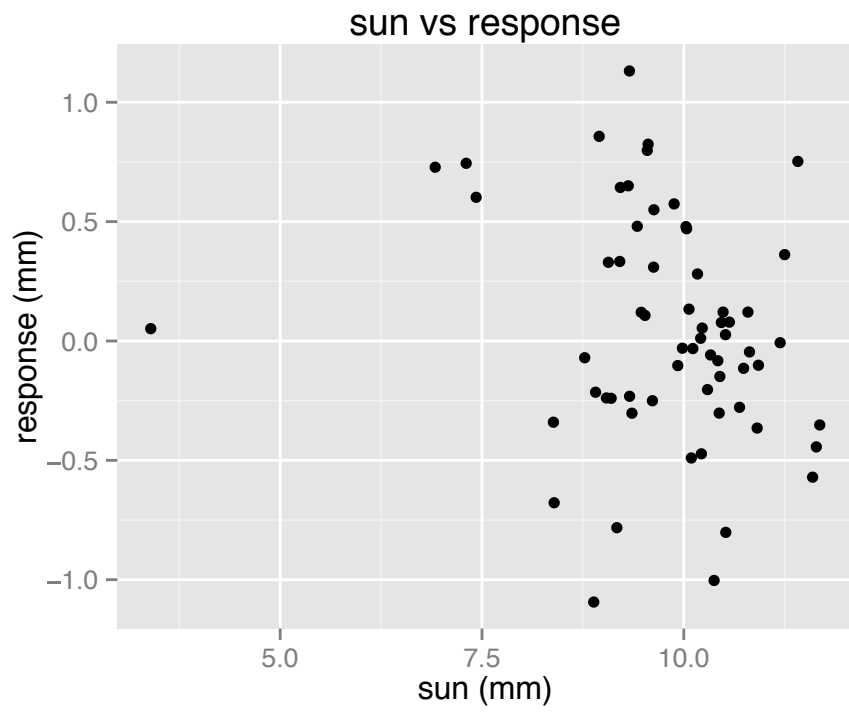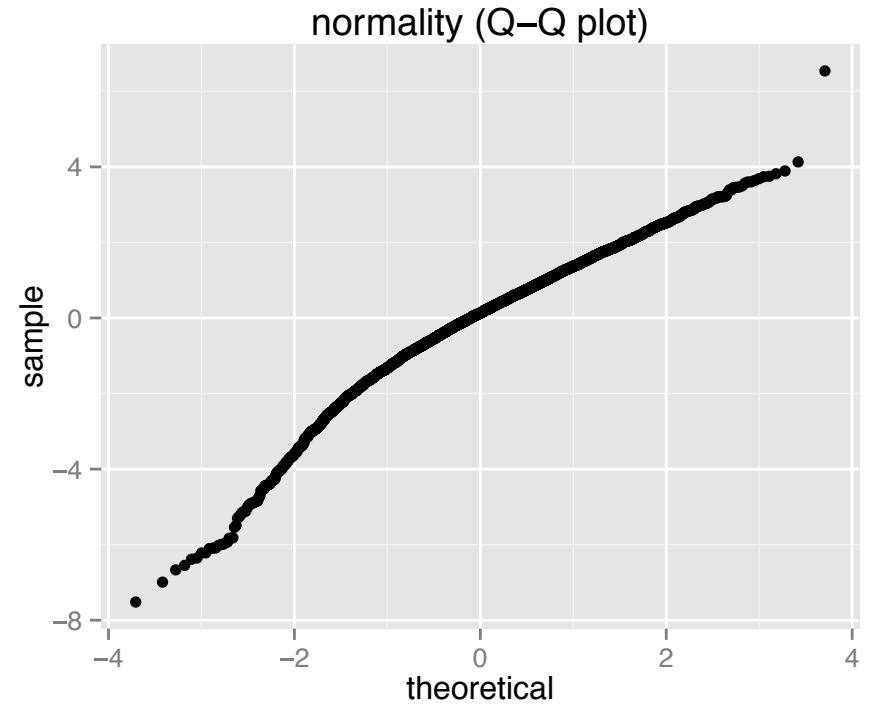

Figure S2E. BA

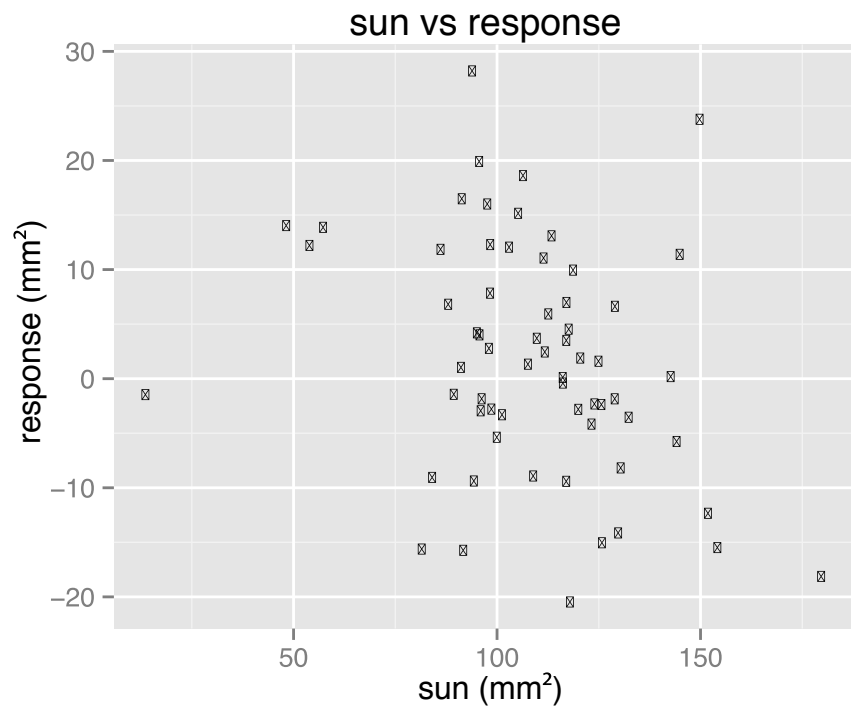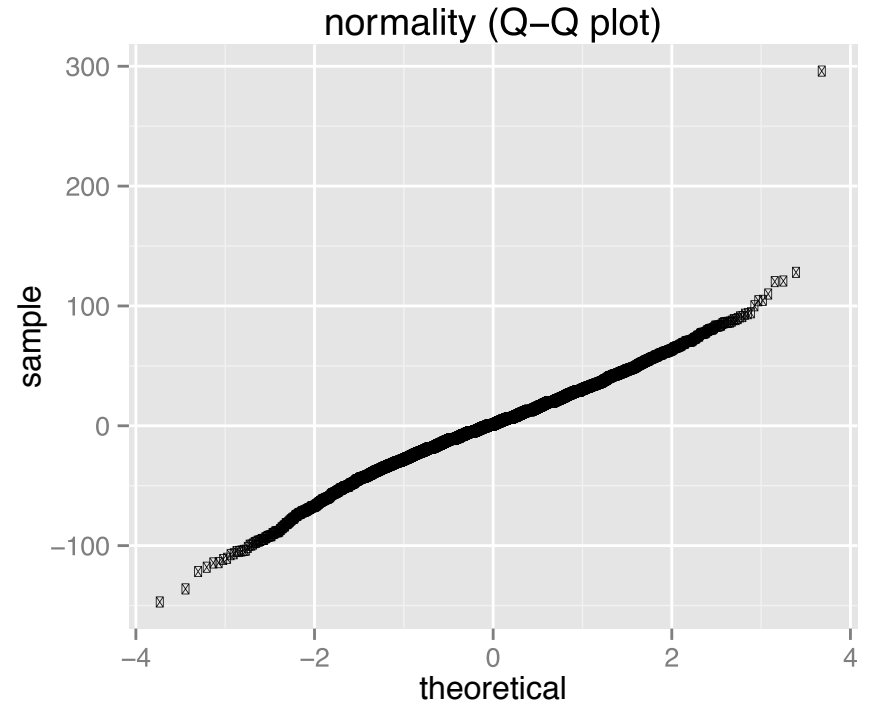

Figure S2F. PBL

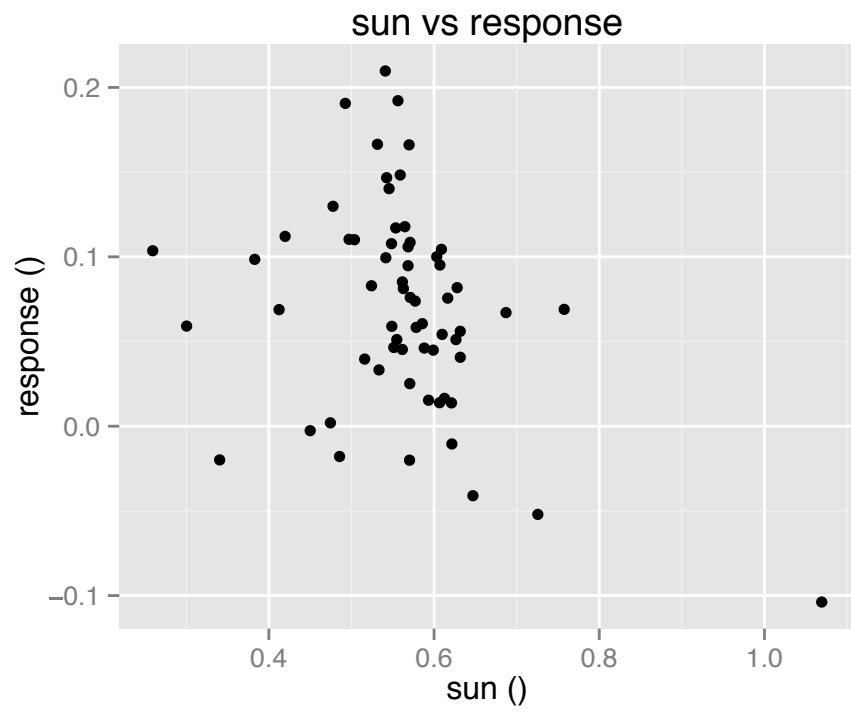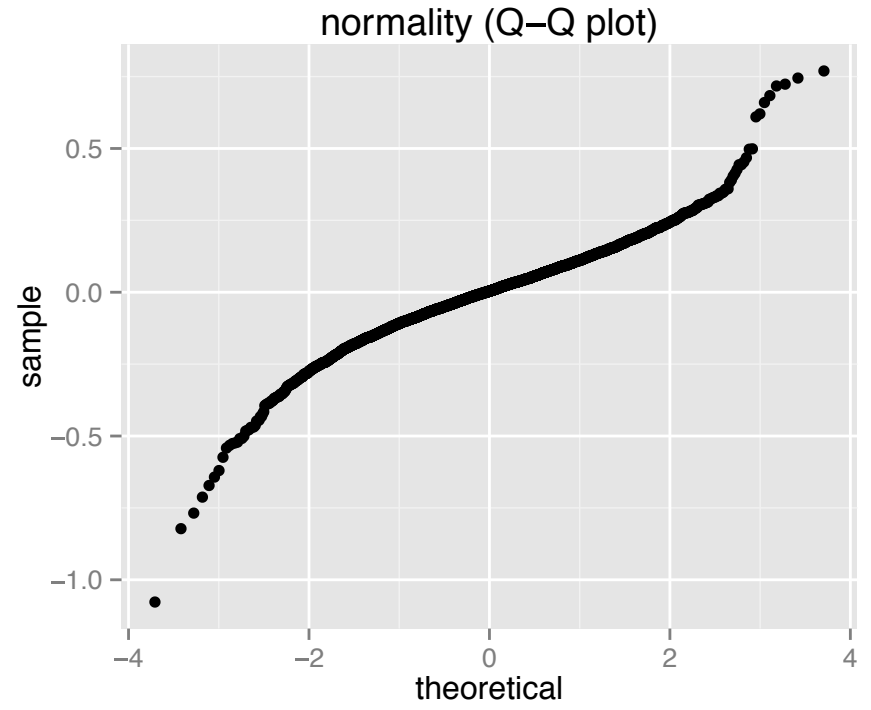

Figure S2G. FT

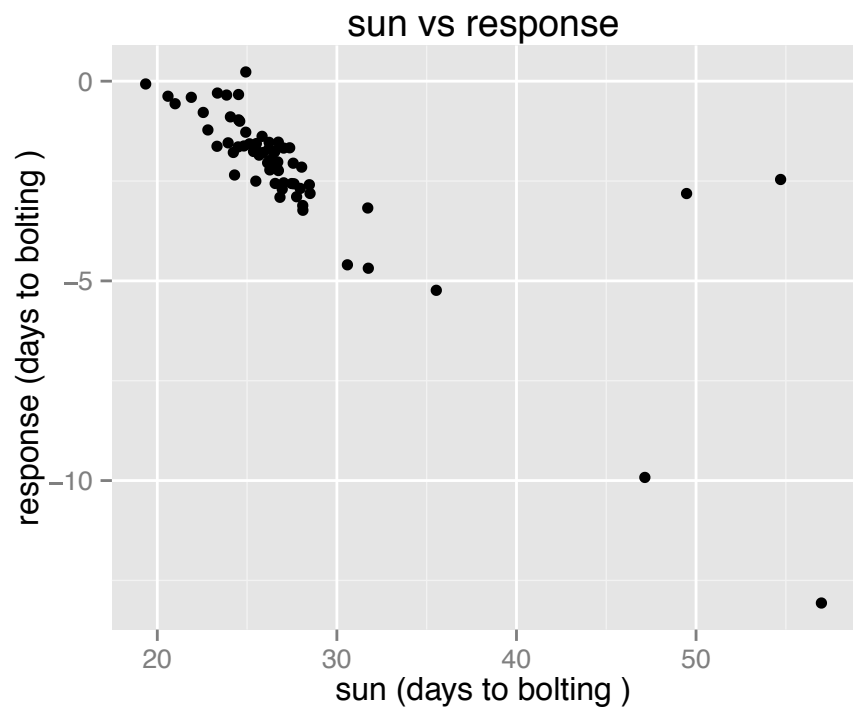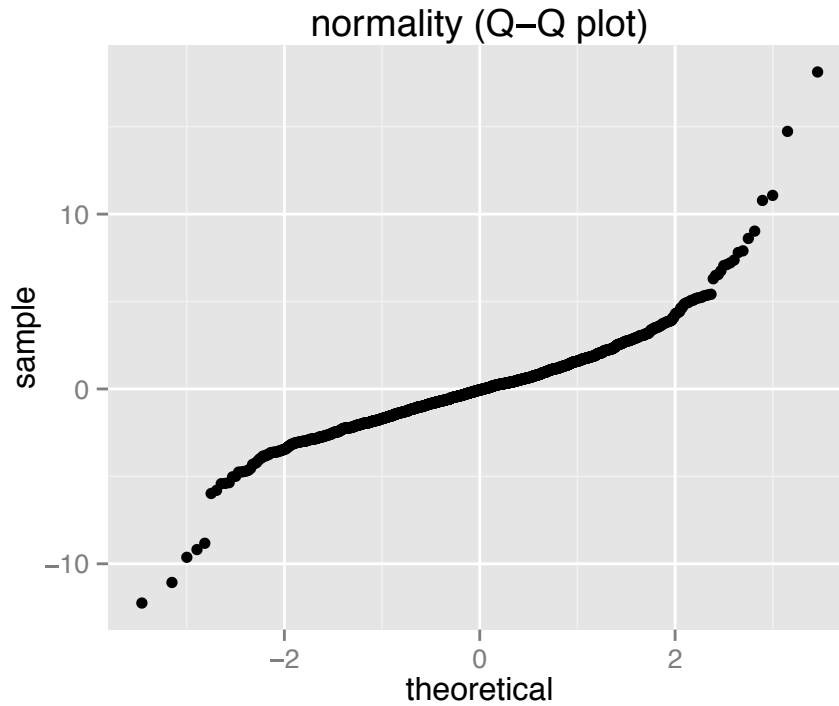

Figure S2H. log2FT

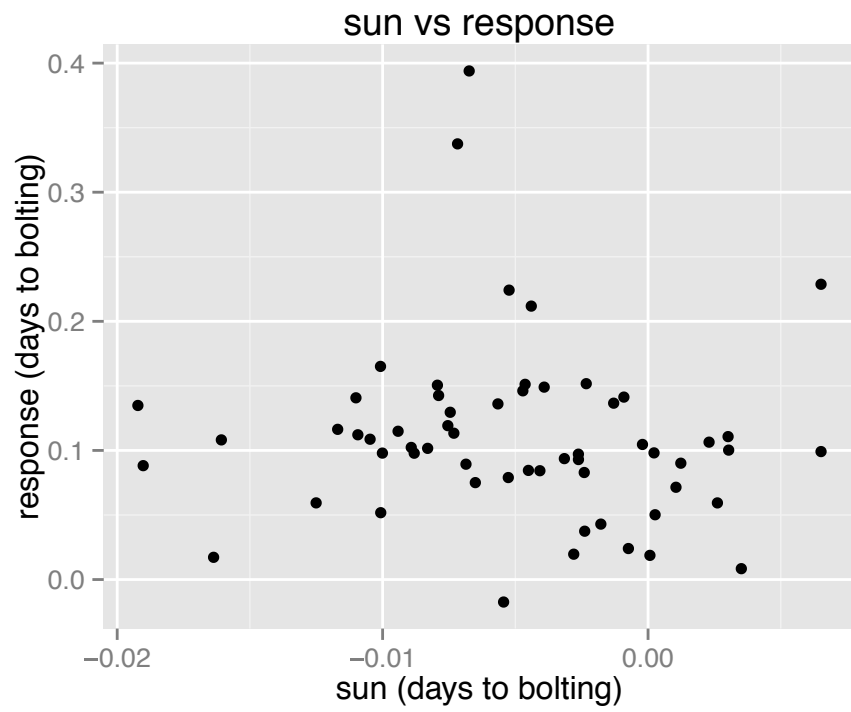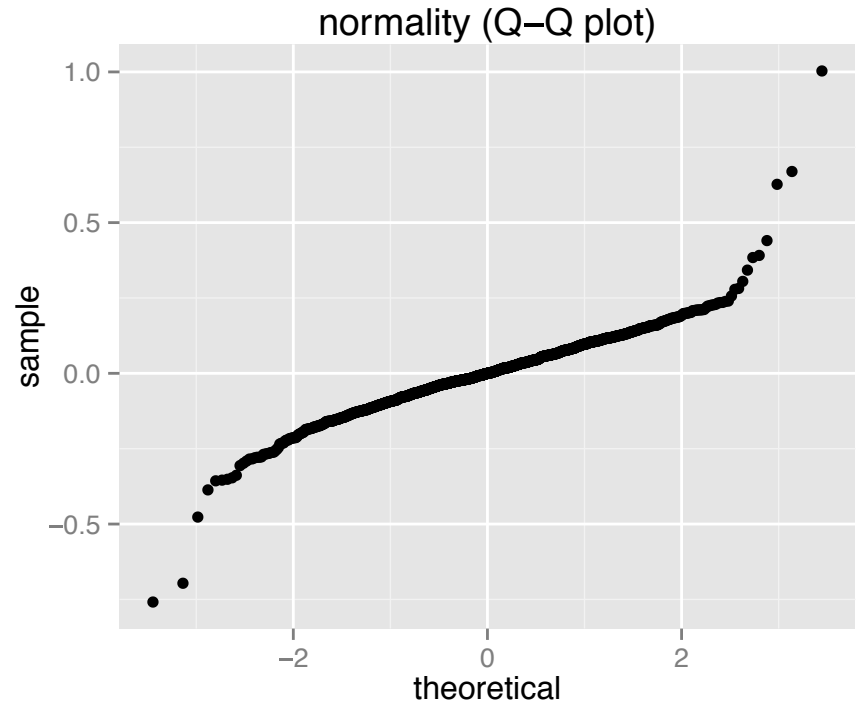

Supplement: pgen.1004953.s002.pdf [file pgen.1004953.s002.pdf]
