# Supplementary material for: Shade Avoidance Components and Pathways in Adult Plants Revealed by Phenotypic Profiling
Source: PubMed Central journal article supplement (PMC4398415; doi:10.1371/journal.pgen.1004953), 2015-04-15

Figure S3A. hypocotyl

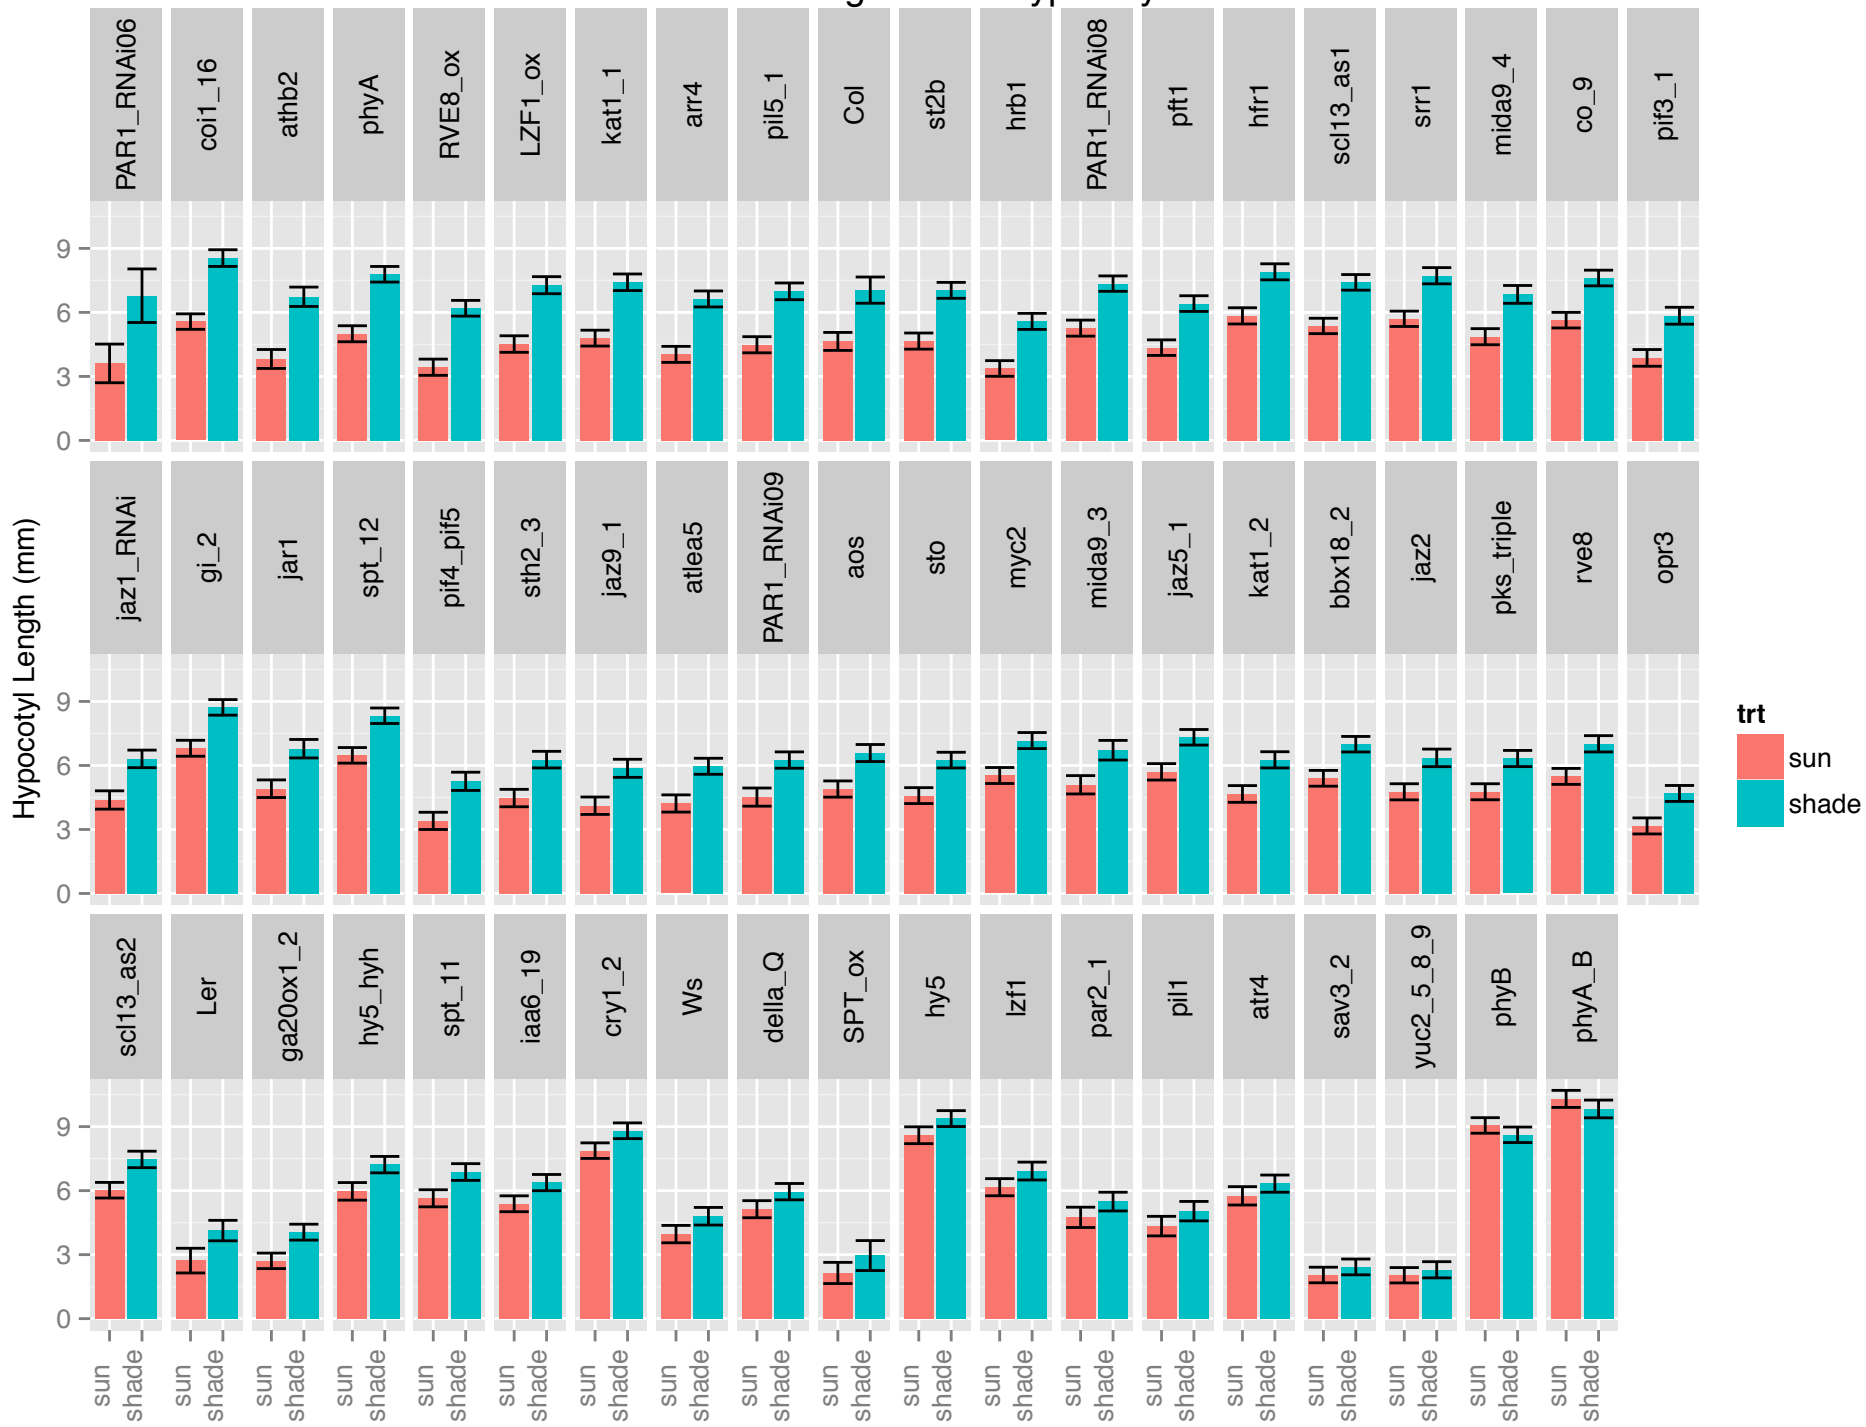

Figure S3B. petiole length

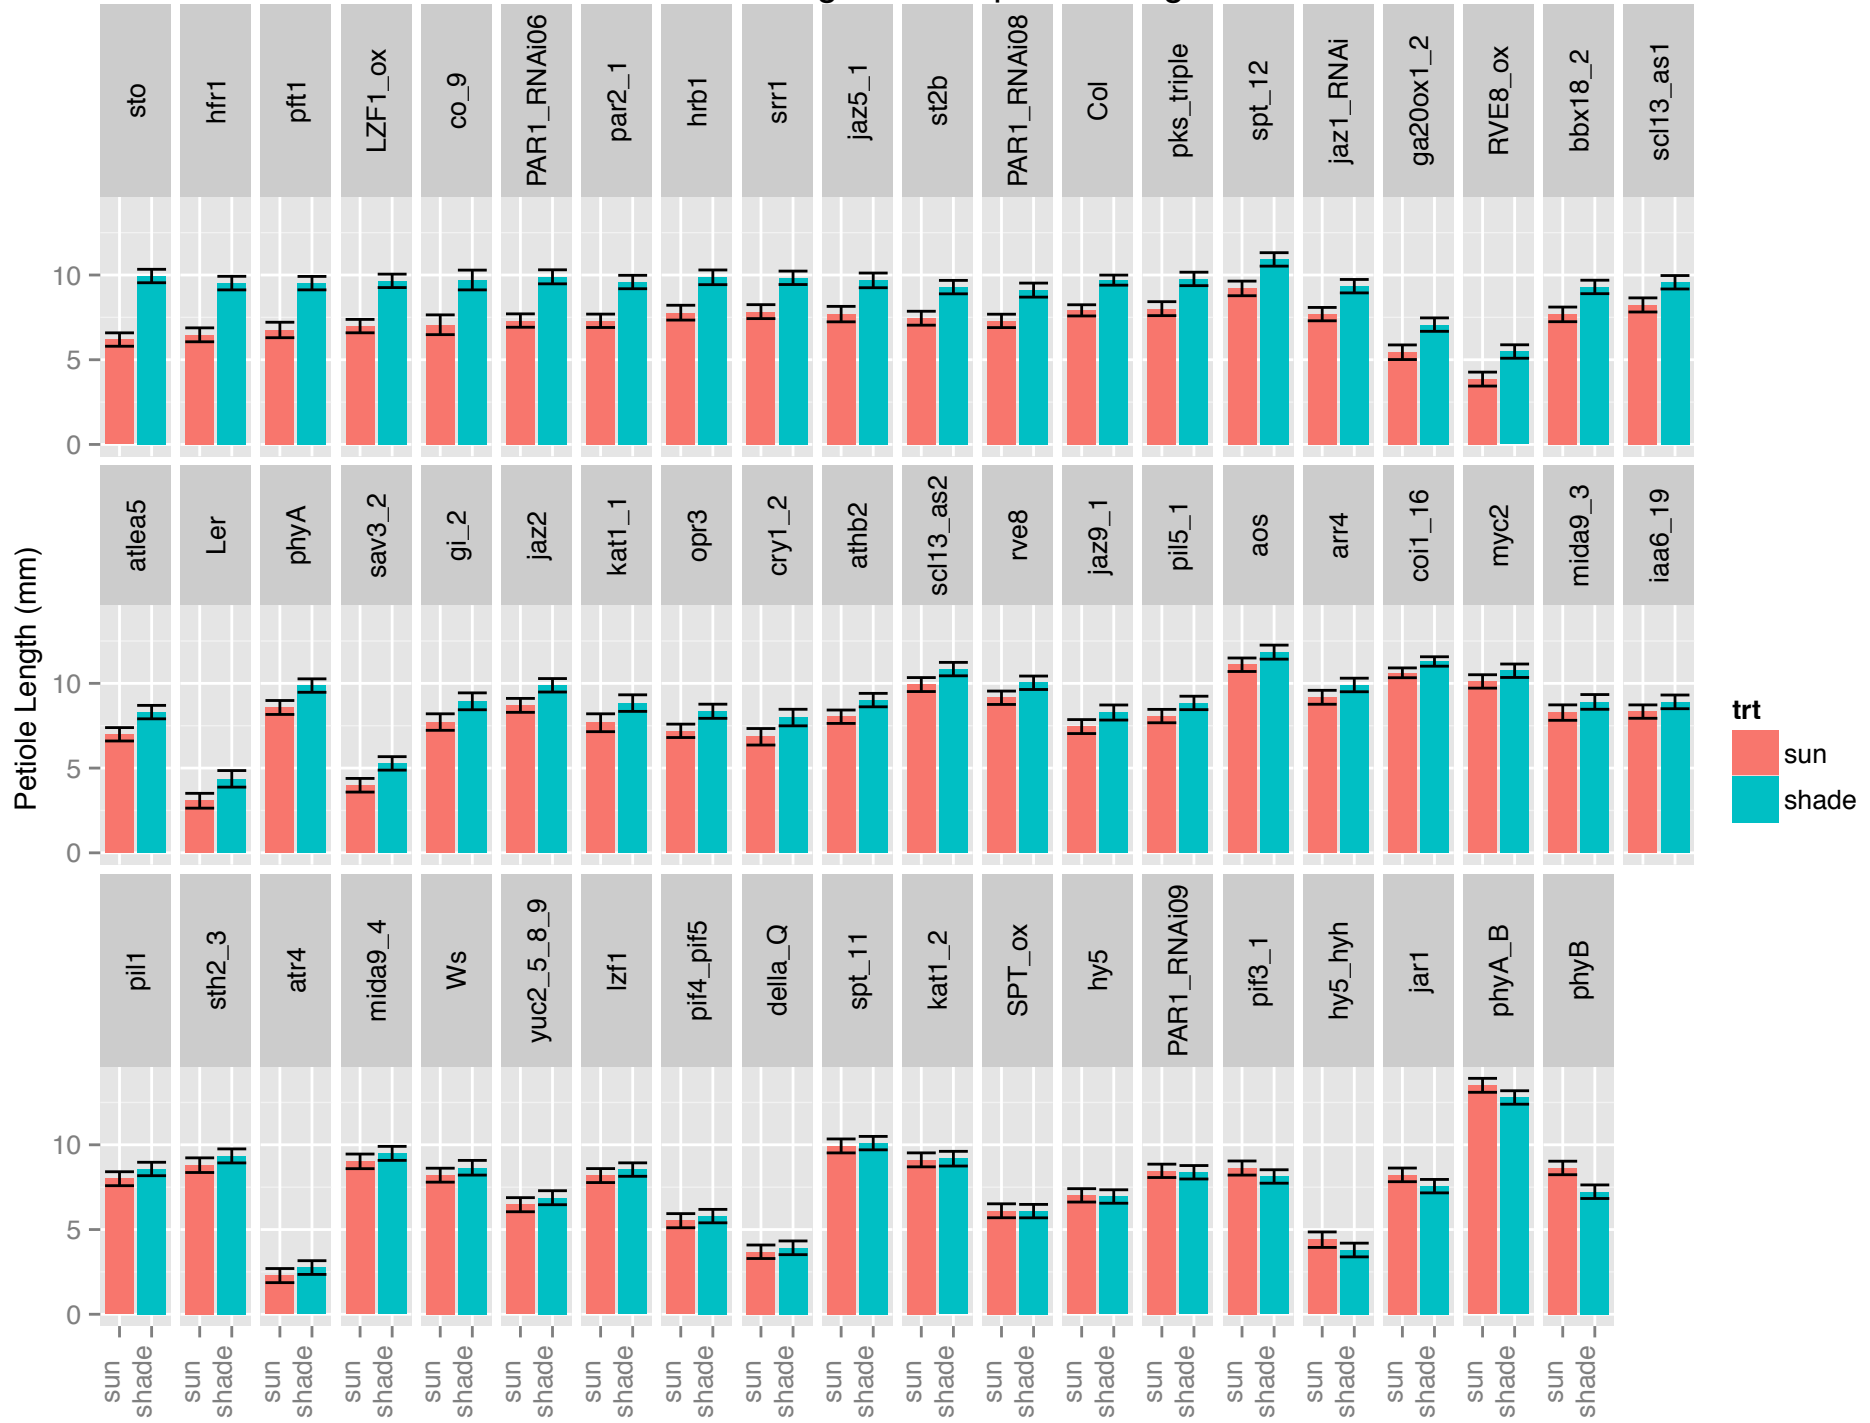

Figure S3C. blade length

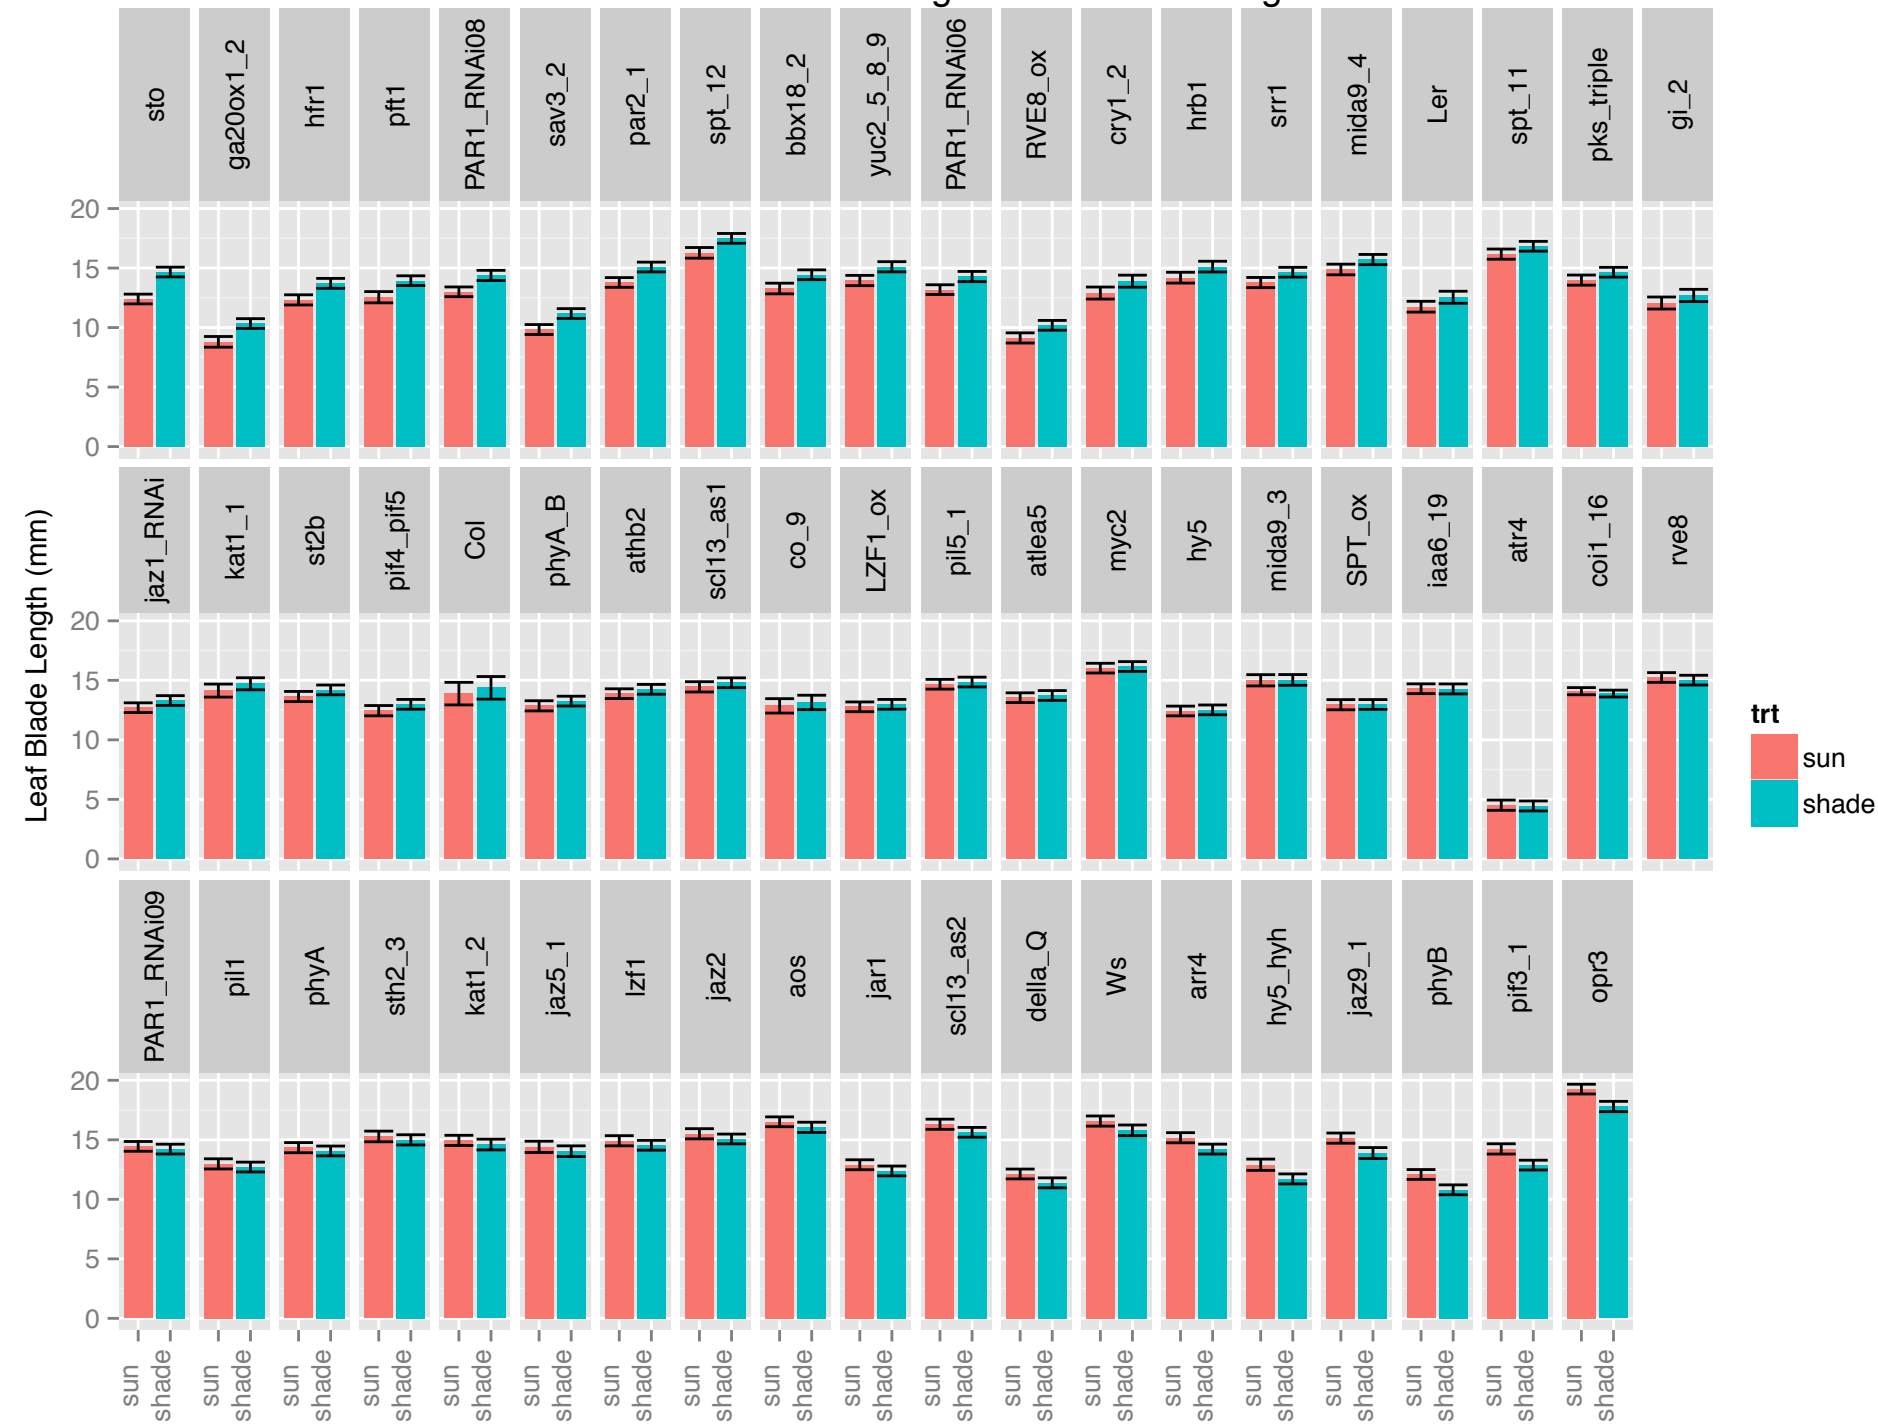



Figure S3E. blade area

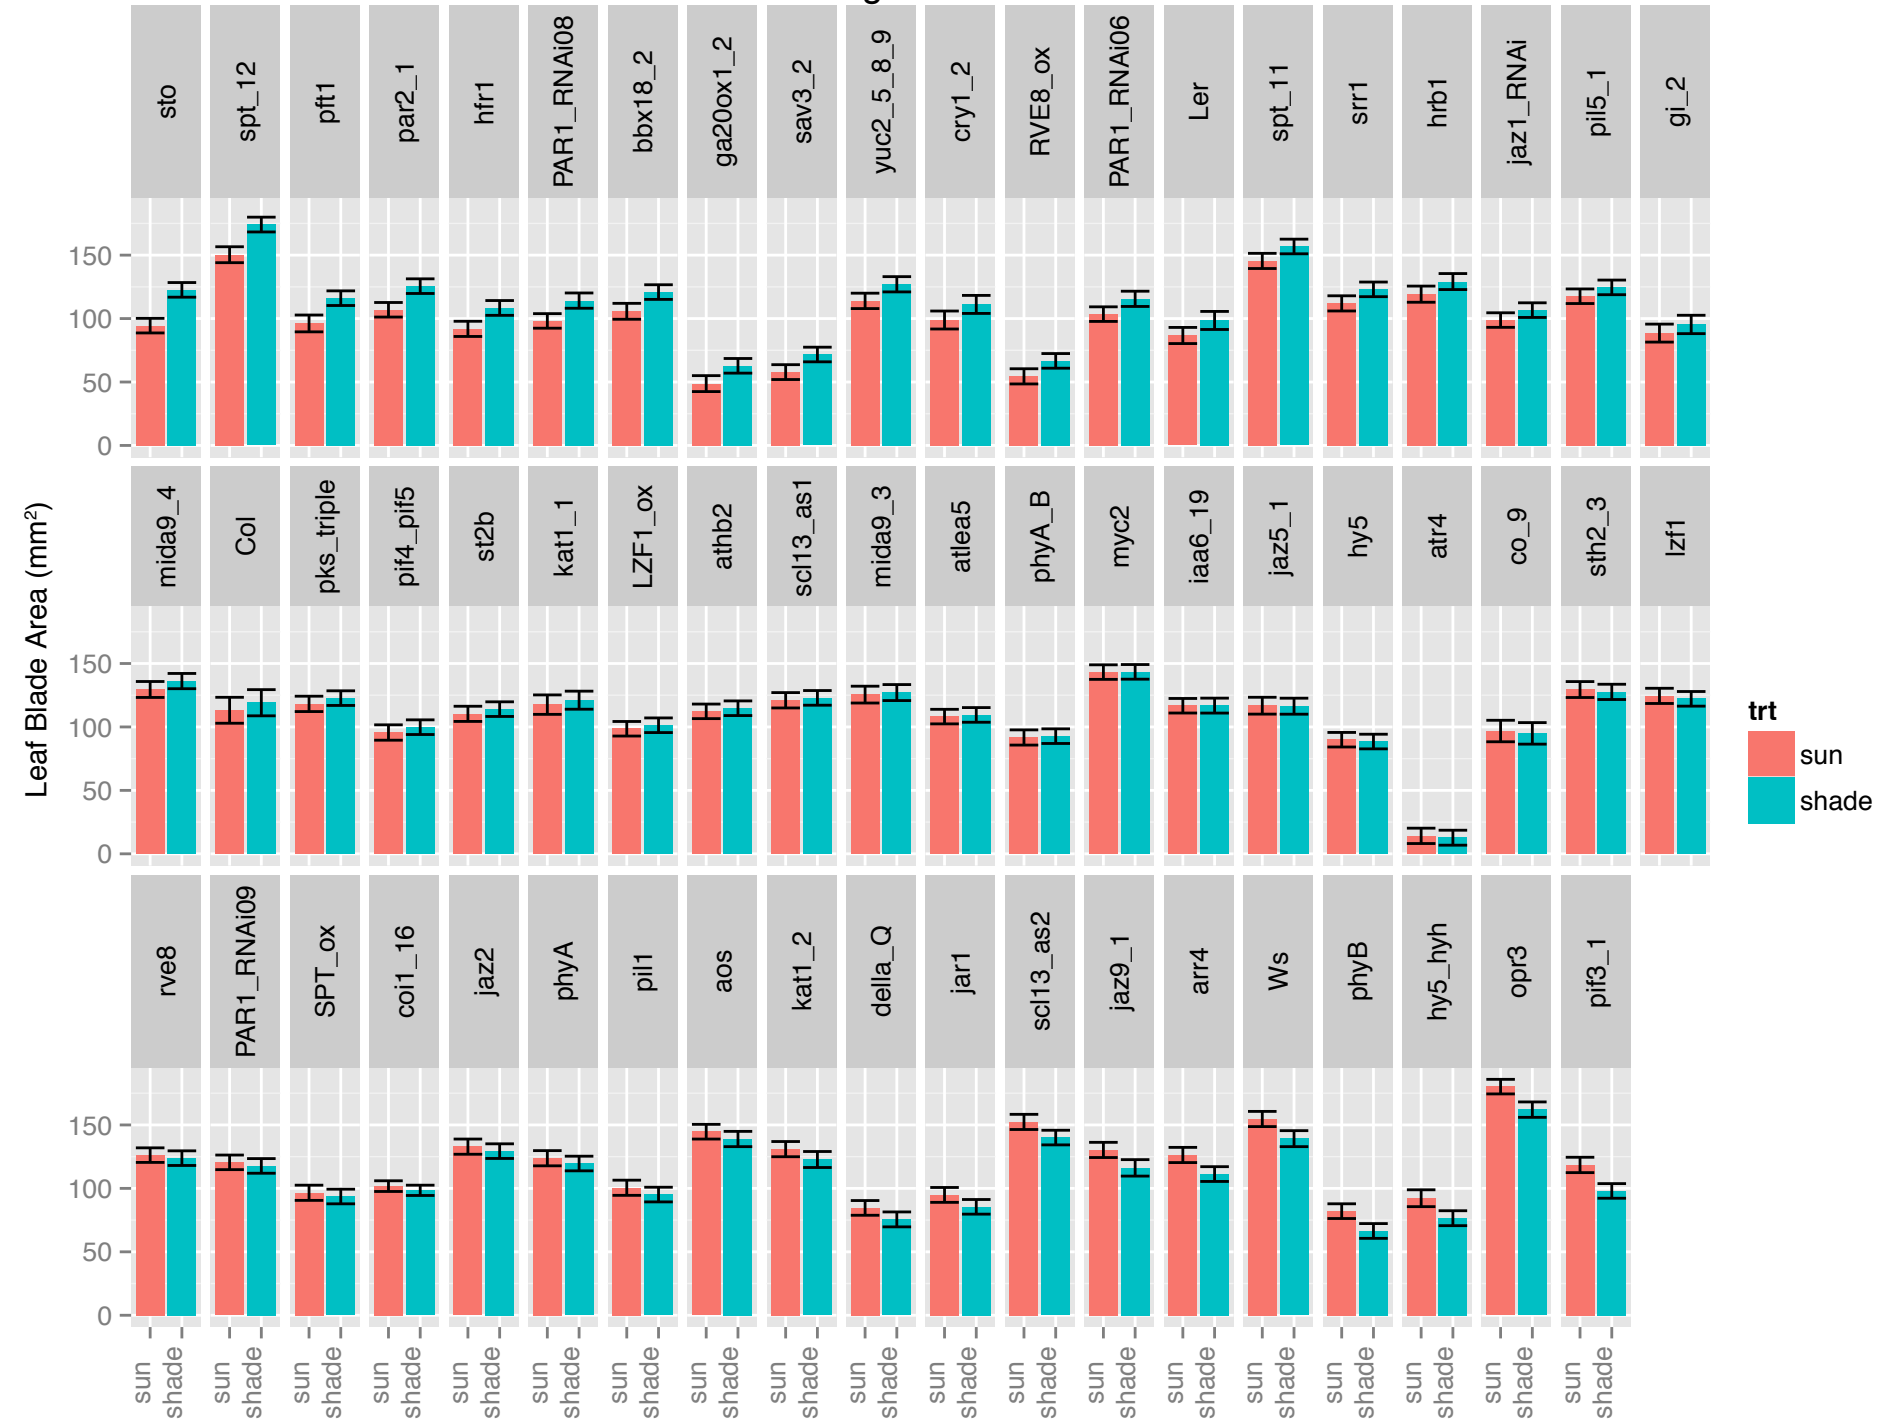

Figure S3F. ratio of petiole length to blade length

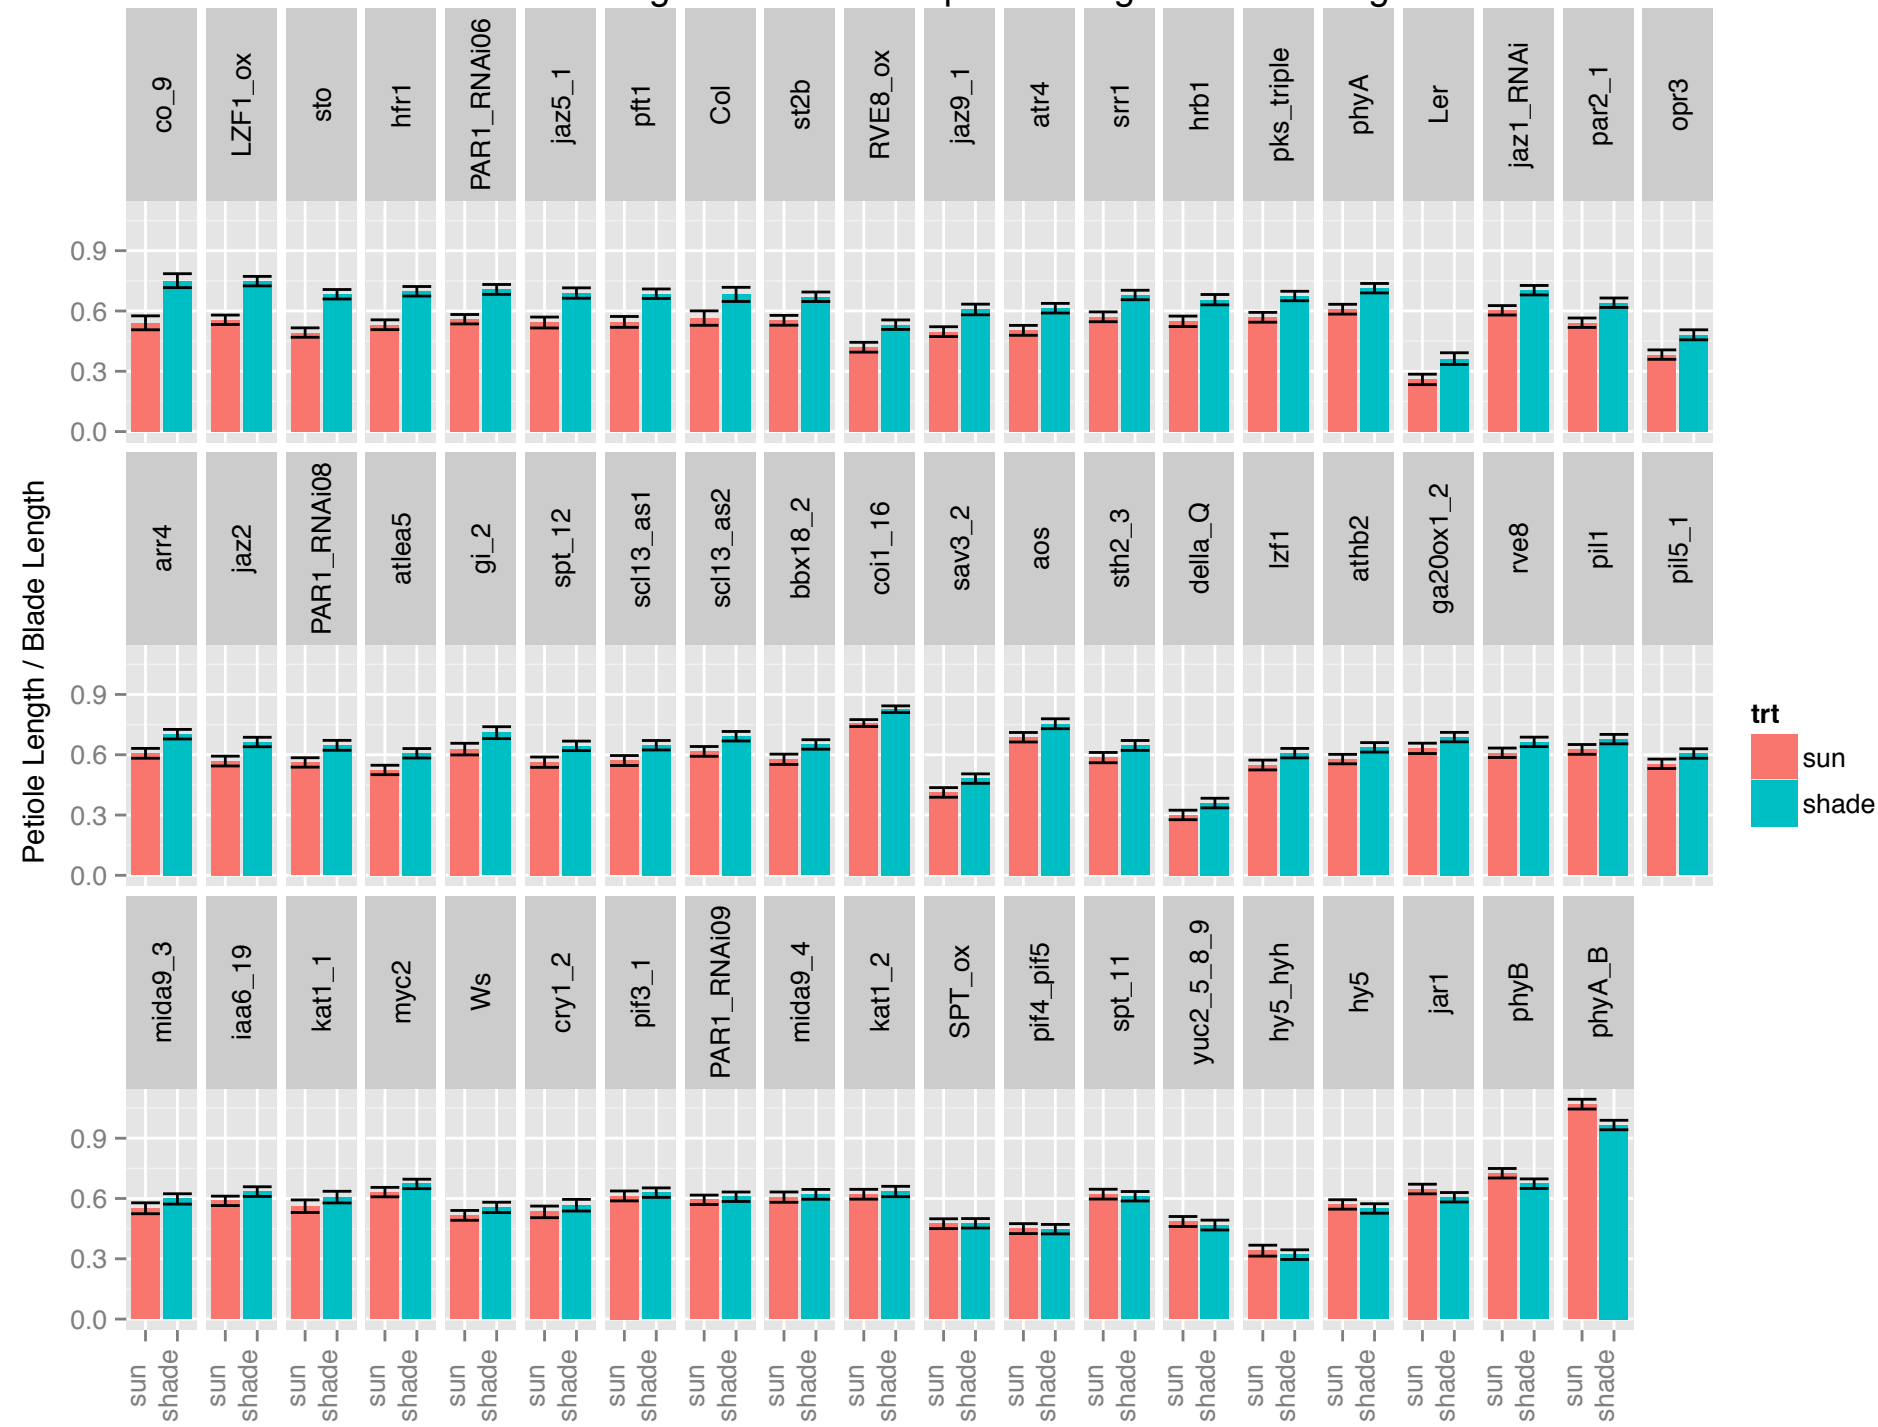

Figure S3G. flowering time

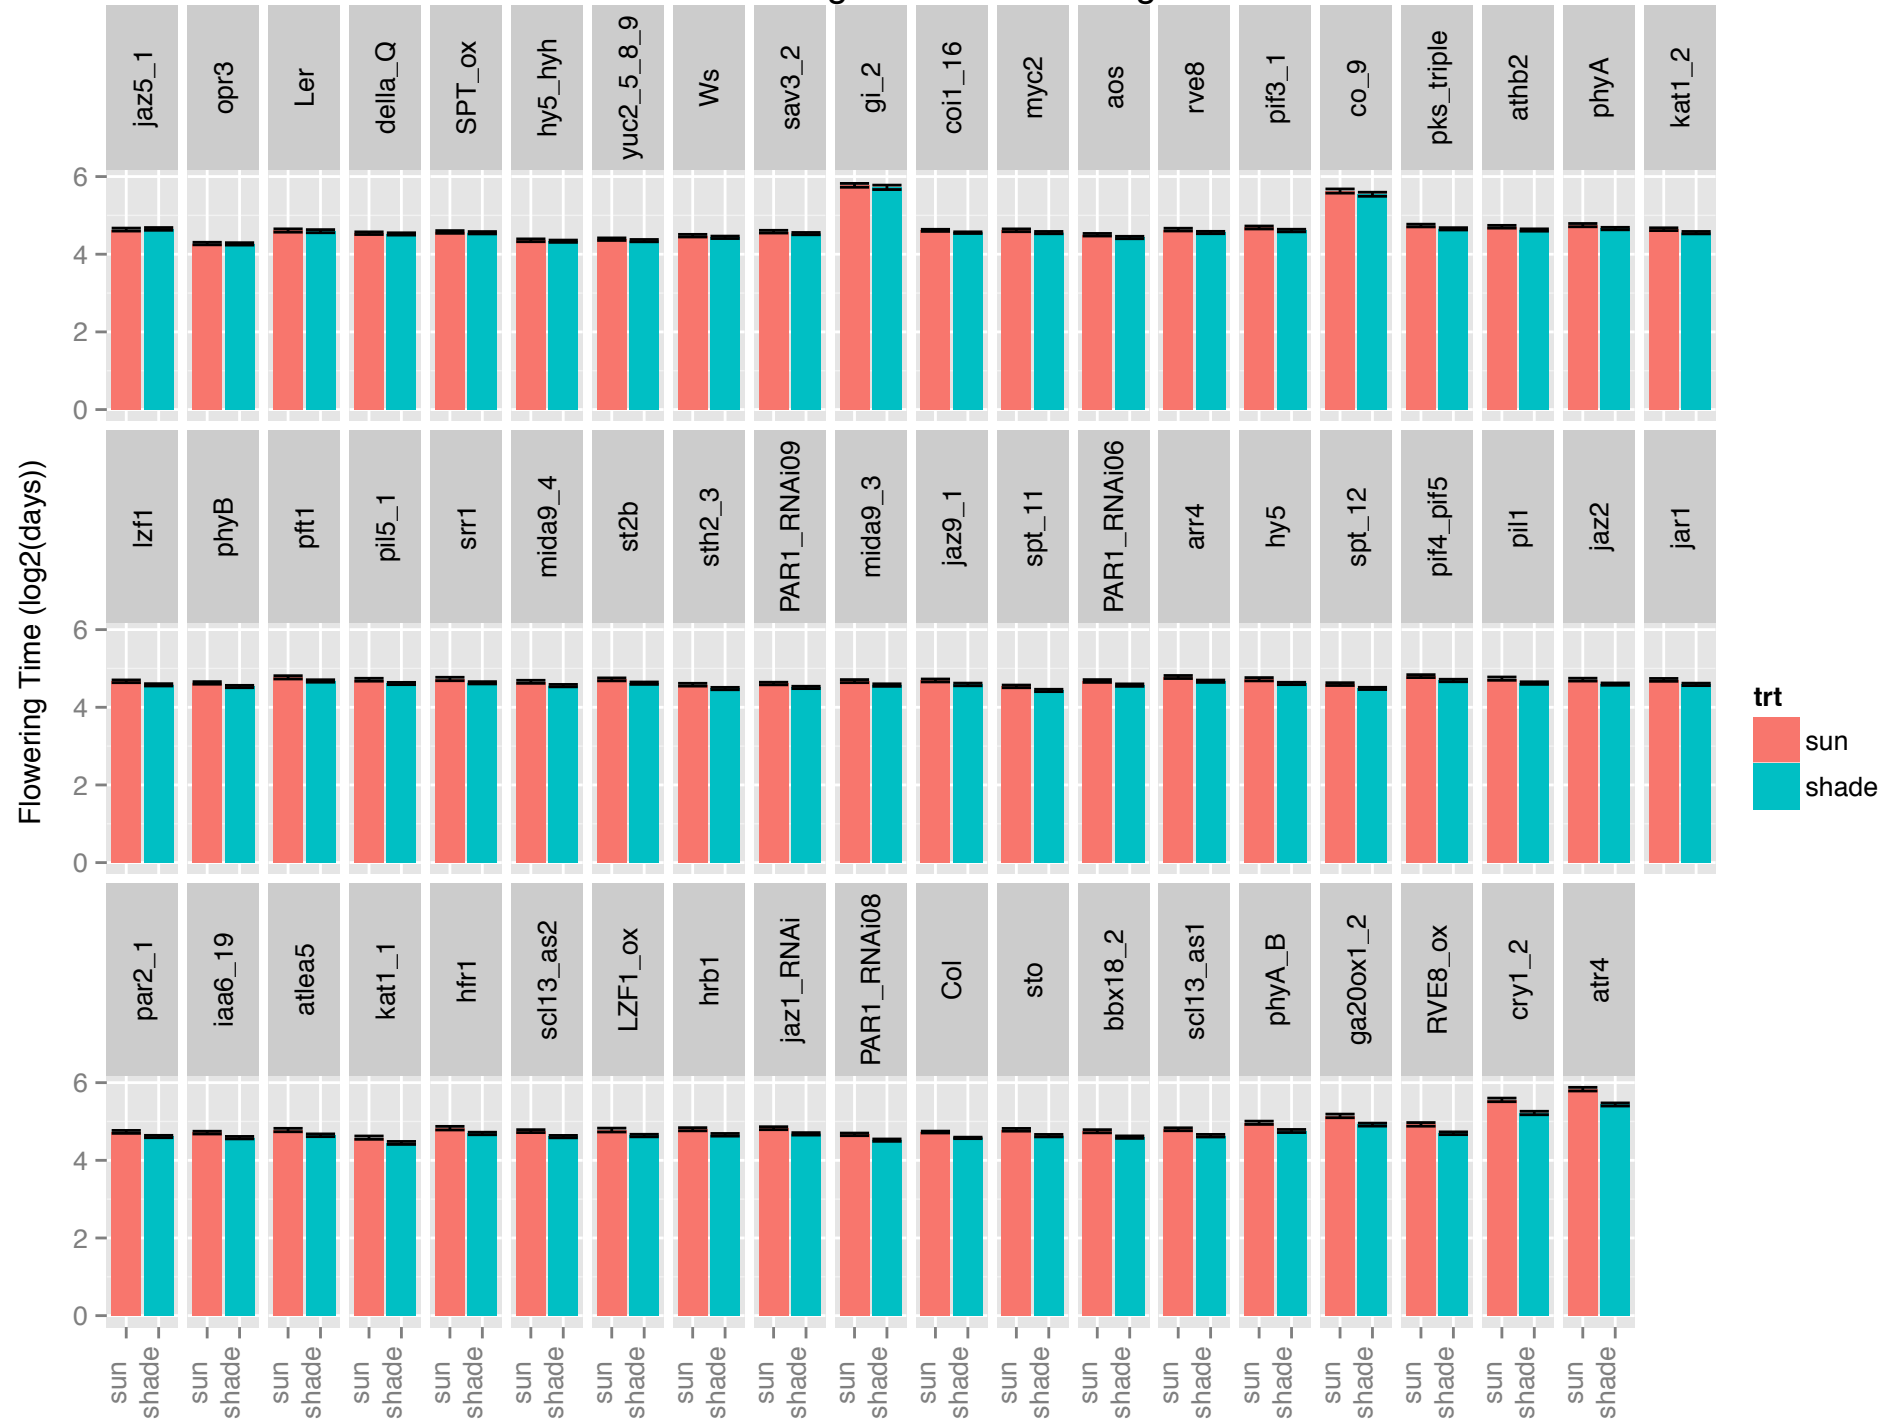

Figure S3H.  
flowering time  
residuals

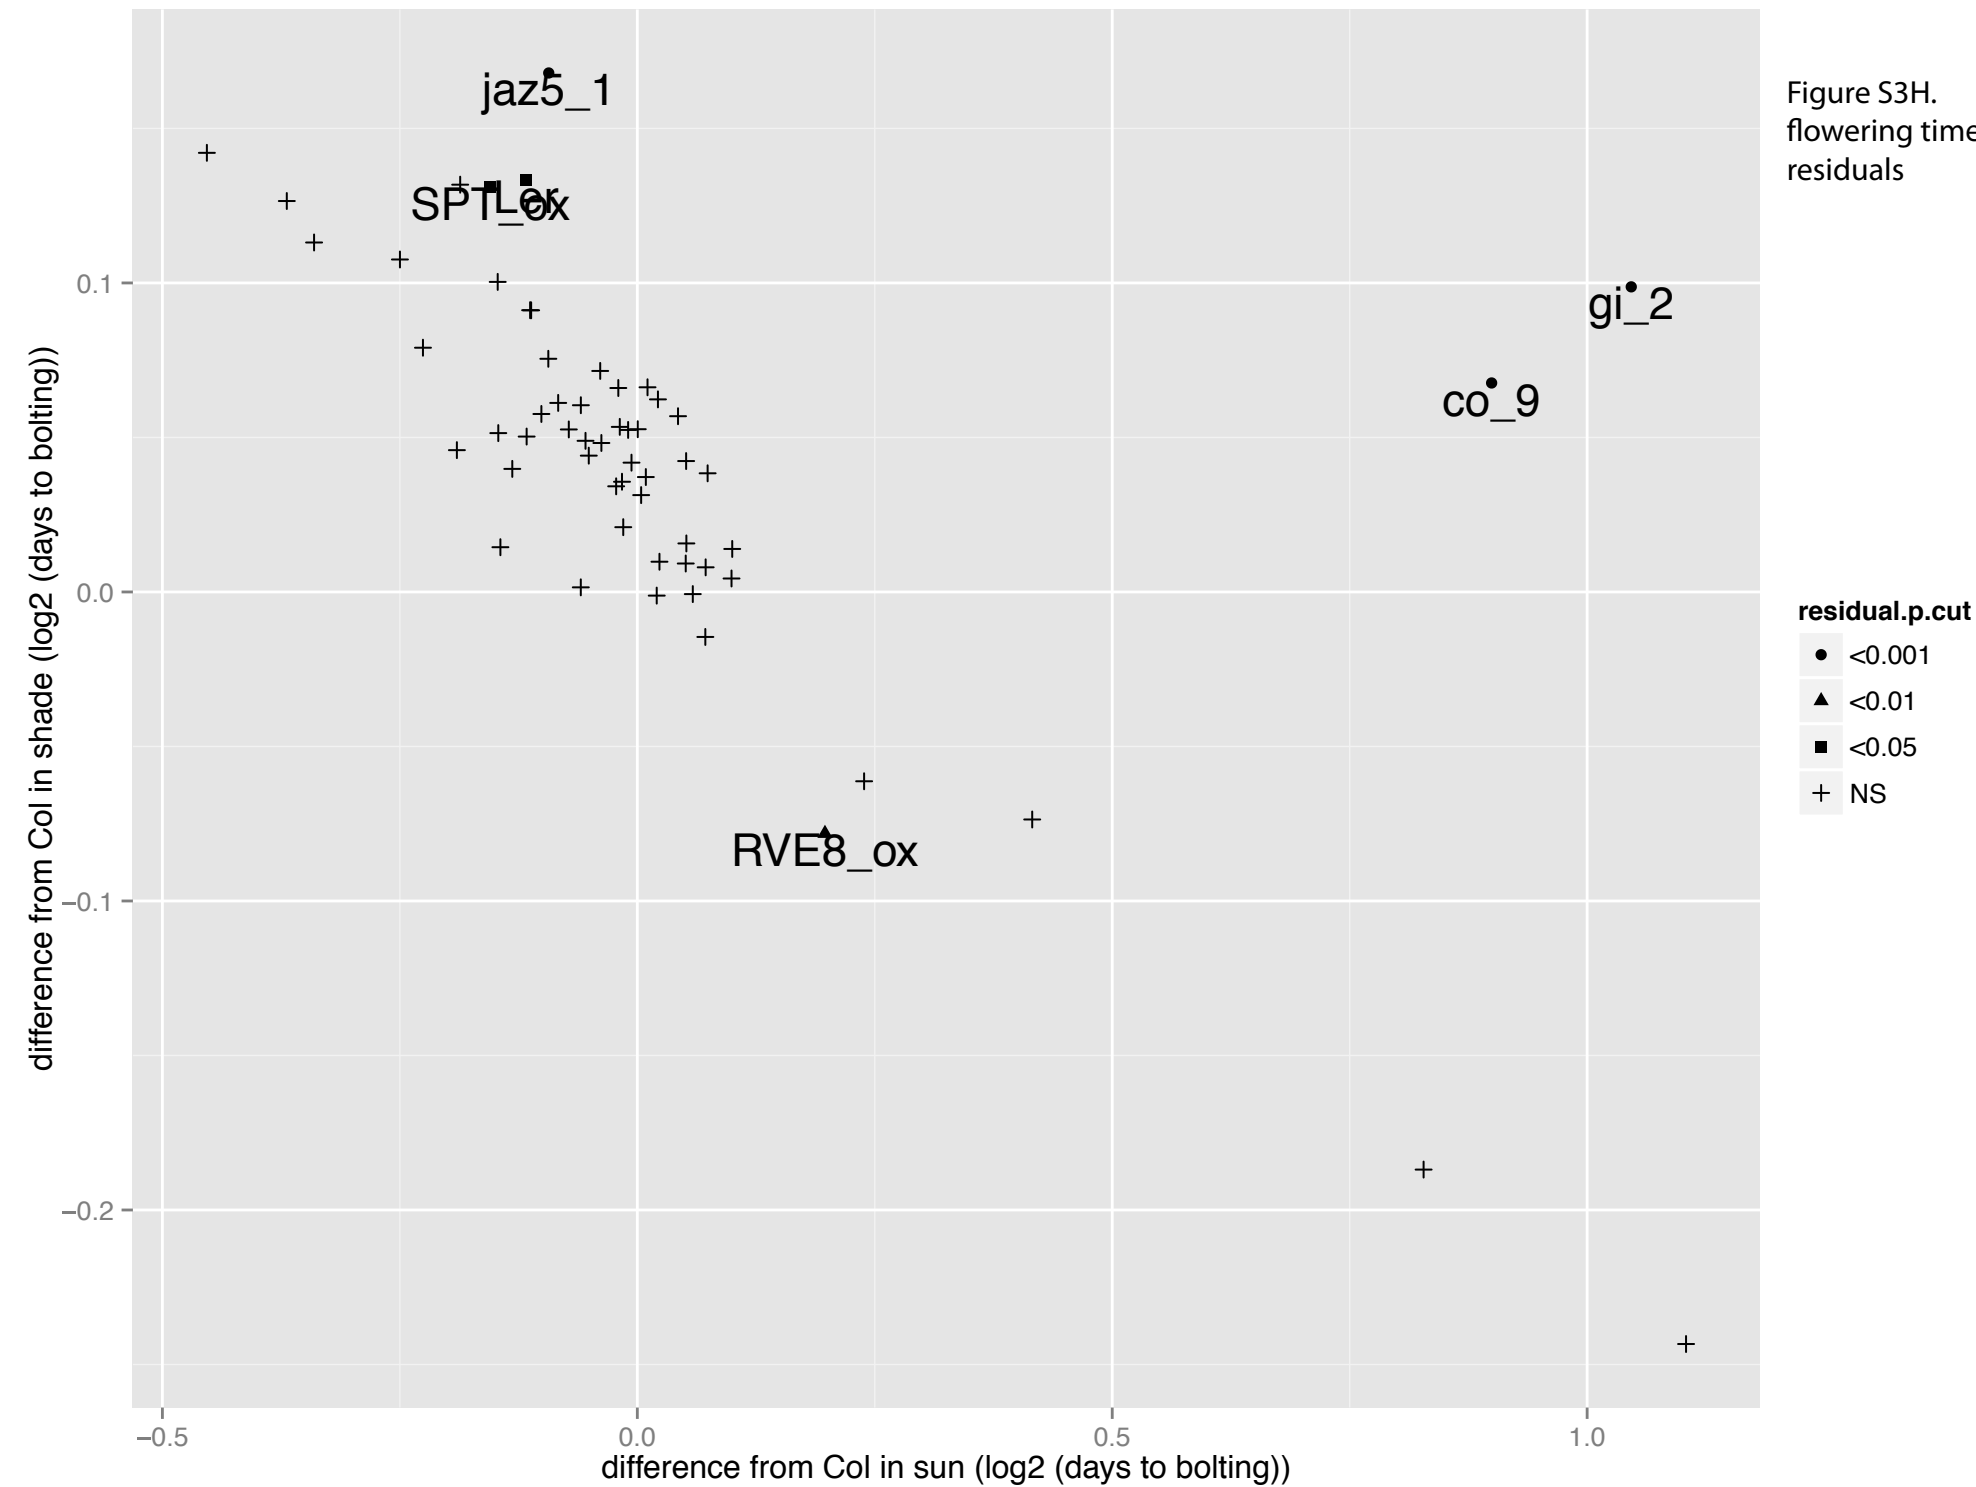

Supplement: pgen.1004953.s003.pdf [file pgen.1004953.s003.pdf]
