# Supplementary material for: Shade Avoidance Components and Pathways in Adult Plants Revealed by Phenotypic Profiling
Source: PubMed Central journal article supplement (PMC4398415; doi:10.1371/journal.pgen.1004953), 2015-04-15

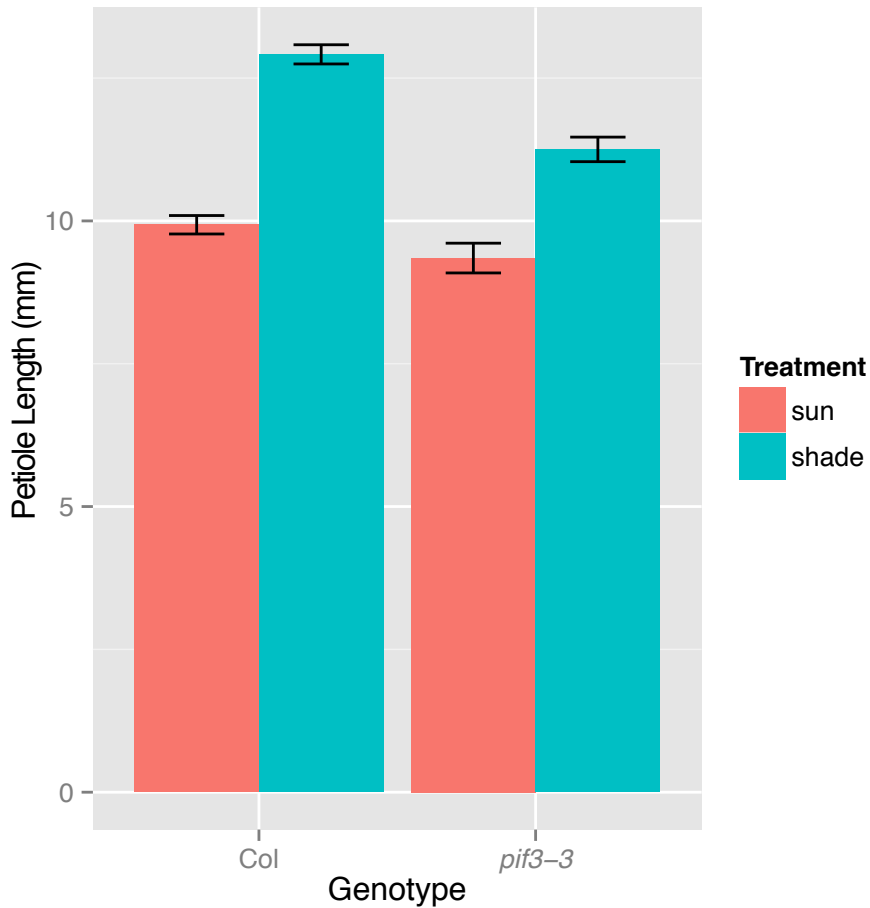

Supplement: pgen.1004953.s004.pdf [file pgen.1004953.s004.pdf]
